# Supplementary material
Source: PubMed Central journal article supplement (PMC3114643)

# nature physics

random walk with barriers

diffusion restricted by permeable membranes

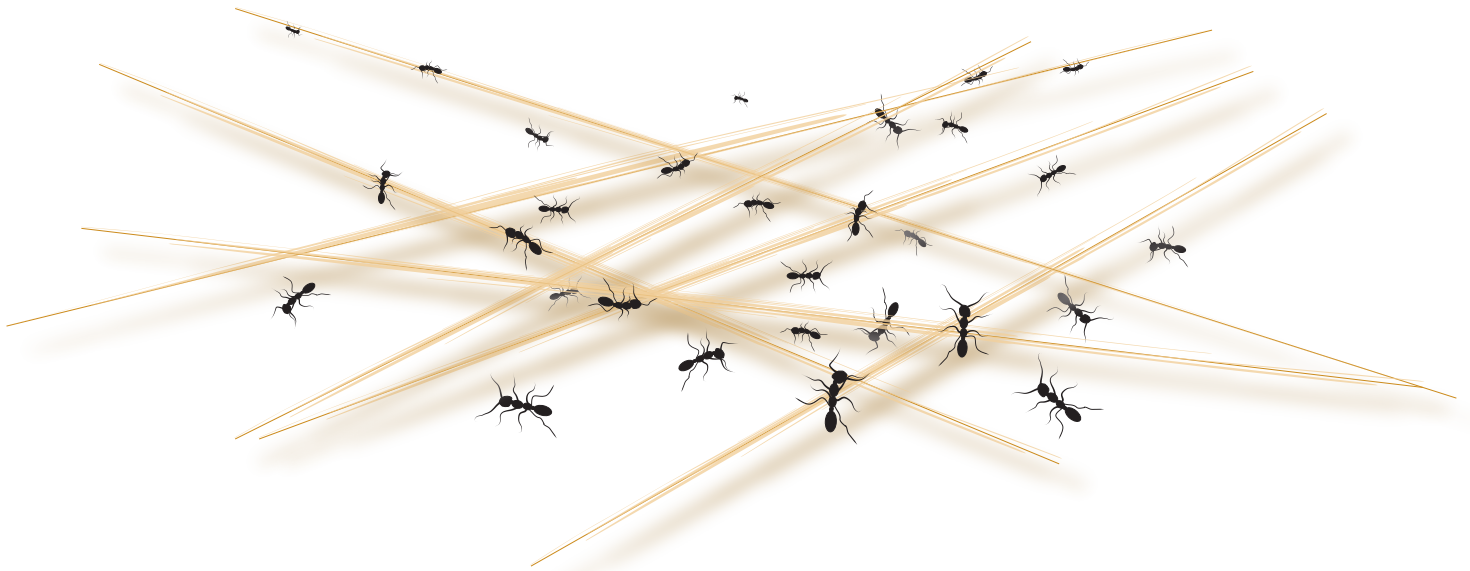

Supplement: NIHMS268282-supplement-1.pdf [file NIHMS268282-supplement-1.pdf]
